# Supplementary material for: Characterisation of drug-resistant Mycobacterium tuberculosis mutations and transmission in Pakistan
Source: PubMed Central journal article supplement (PMC9095715; doi:10.1038/s41598-022-11795-4), 2022-05-11

**S1 Table: Strain-types**

| Lineage | Large sequence polymorphisms lineage | Spoligotype family | Region of difference no. | N   | %    |
|---------|--------------------------------------|--------------------|--------------------------|-----|------|
| 3       | East-African-Indian                  | CAS                | 750                      | 363 | 67.9 |
| 2.2.1   | East-Asian (Beijing)                 | Beijing-RD181      | 105;207;181              | 29  | 5.4  |
| 4.5     | Euro-American                        | H;T                | 122                      | 23  | 4.3  |
| 4.9     | Euro-American (H37Rv-like)           | T1                 | None                     | 22  | 4.1  |
| 1.1.2   | Indo-Oceanic                         | EAI3;EAI5          | 239                      | 14  | 2.6  |
| 3.1.2   | East-African-Indian                  | CAS;CAS2           | 750                      | 11  | 2.1  |
| 3.1.2.1 | East-African-Indian                  | CAS2               | 750                      | 10  | 1.9  |
| 3.1.3   | East-African-Indian                  | CAS                | 750                      | 9   | 1.7  |
| 4.8     | Euro-American (mainly T)             | T1;T2;T3;T5        | 219                      | 9   | 1.7  |
| 1.2.2.2 | Indo-Oceanic                         | NA                 | 239                      | 7   | 1.3  |
| 4.2.2.2 | Euro-American (Ural)                 | T;LAM7-TUR         | None                     | 7   | 1.3  |
| 2.2.1.1 | East-Asian (Beijing)                 | Beijing-RD150      | 105;207;181;150          | 5   | 0.9  |
| 3.1     | East-African-Indian                  | Non-CAS1-Delhi     | 750                      | 4   | 0.7  |
| 2.2.1.2 | East-Asian (Beijing)                 | Beijing-RD142      | 105;207;181;142          | 2   | 0.4  |
| 4       | Euro-American                        | LAM;T;S;X;H        | None                     | 2   | 0.4  |
| 4.1.1.1 | Euro-American (X-type)               | X2                 | 183                      | 2   | 0.4  |
| 4.1.1.3 | Euro-American (X-type)               | X1;X3              | 193                      | 2   | 0.4  |
| 4.2.1   | Euro-American (TUR)                  | H3;H4              | None                     | 2   | 0.4  |
| 4.2.2   | Euro-American (Ural)                 | T;LAM7-TUR         | None                     | 2   | 0.4  |
| 4.6     | Euro-American                        | T;LAM              | None                     | 2   | 0.4  |
| 4.6.5   | Euro-American                        | T;LAM              | None                     | 2   | 0.4  |
| 1.1.3.3 | Indo-Oceanic                         | NA                 | 239                      | 1   | 0.2  |
| 4.1.1.2 | Euro-American (X-type)               | X1                 | None                     | 1   | 0.2  |
| 4.1.2.1 | Euro-American (Haarlem)              | T1;H1              | 182                      | 1   | 0.2  |
| 4.6.2   | Euro-American                        | T;LAM              | 726                      | 1   | 0.2  |
| 4.6.2.1 | Euro-American                        | T3                 | 726                      | 1   | 0.2  |
| 4.6.2.2 | Euro-American (Cameroon)             | LAM10-CAM          | 726                      | 1   | 0.2  |

**S2 Table: Drug-resistant samples according to drug susceptibility tests (DSTs) and genotypic predictions**

| Drug             | DST | DST       |           | Genotypic  |           | DST                 | DST                     |
|------------------|-----|-----------|-----------|------------|-----------|---------------------|-------------------------|
|                  | N   | resistant | resistant | resistant* | resistant | Susceptible         | resistant               |
|                  |     | N         | %         | N          | %         | Genotypic resistant | Genotypic non-resistant |
| Rifampicin       | 487 | 417       | 85.6      | 460        | 86.0      | 6                   | 6                       |
| Isoniazid        | 487 | 411       | 84.4      | 435        | 81.3      | 7                   | 25                      |
| Ethambutol       | 479 | 265       | 55.3      | 385        | 72.0      | 96                  | 17                      |
| Pyrazinamide     | 444 | 189       | 42.6      | 258        | 48.2      | 42                  | 24                      |
| Streptomycin     | 43  | 24        | 55.8      | 238        | 44.5      | 4                   | 6                       |
| Ofloxacin        | 85  | 46        | 54.1      | 277        | 51.8      | 5                   | 0                       |
| Moxifloxacin     | 52  | 4         | 7.7       | 277        | 51.8      | 29                  | 0                       |
| Levofloxacin     | 0   | -         | -         | 277        | 51.8      | 0                   | 0                       |
| Amikacin         | 110 | 42        | 38.2      | 75         | 14.0      | 0                   | 9                       |
| Kanamycin        | 112 | 44        | 39.3      | 79         | 14.8      | 0                   | 7                       |
| Capreomycin      | 57  | 15        | 26.3      | 78         | 14.6      | 18                  | 2                       |
| Ciprofloxacin    | 37  | 37        | 100       | 277        | 51.8      | 0                   | 4                       |
| Ethionamide      | 37  | 6         | 16.2      | 102        | 19.1      | 11                  | 0                       |
| PAS              | 0   | -         | -         | 10         | 1.9       | 0                   | 0                       |
| Cycloserine      | 0   | -         | -         | 2          | 0.4       | 0                   | 0                       |
| Clofazimine      | 0   | -         | -         | 1          | 0.2       | 0                   | 0                       |
| Bedaquiline      | 0   | -         | -         | 1          | 0.2       | 0                   | 0                       |
| Linezolid        | 0   | -         | -         | 0          | 0.0       | 0                   | 0                       |
| Delamanid        | 0   | -         | -         | 0          | 0.0       | 0                   | 0                       |
| Fluoroquinolones | 174 | 87        | 50.0      | 277        | 51.8      | -                   | -                       |
| Aminoglycosides  | 322 | 125       | 38.8      | 75         | 14.0      | -                   | -                       |

\* from TB-Profiler; PAS para aminosalicylic acid; DST drug susceptibility test

**S3 Table: Drug resistance (DR) categories by Lineage (L)**

| DR status | L1 | L1   | L2 | L2   | L3  | L3   | L4 | L4   | Total | Total |
|-----------|----|------|----|------|-----|------|----|------|-------|-------|
|           | N  | %    | N  | %    | N   | %    | N  | %    | N     | %     |
| Sensitive | 1  | 4.5  | 0  | 0.0  | 53  | 13.4 | 6  | 7.5  | 60    | 11.2  |
| Pre-MDR   | 2  | 9.1  | 0  | 0.0  | 28  | 7.1  | 1  | 1.3  | 31    | 5.8   |
| MDR       | 12 | 54.5 | 25 | 69.4 | 242 | 61.0 | 49 | 61.3 | 328   | 61.3  |
| Pre-XDR   | 0  | 0.0  | 7  | 19.4 | 25  | 6.3  | 15 | 18.8 | 47    | 8.8   |
| XDR       | 5  | 22.7 | 4  | 11.1 | 48  | 12.1 | 9  | 11.3 | 66    | 12.3  |
| Other     | 2  | 9.1  | 0  | 0.0  | 1   | 0.3  | 0  | 0.0  | 3     | 0.6   |
| Total     | 22 | 100  | 36 | 100  | 397 | 100  | 80 | 100  | 535   | 100.0 |

MDR multidrug resistant, XDR extensively drug resistant

**S4 Table: Sensitivity analysis of the clustering by SNP distance**

| SNP distance | No. Clusters | N   | Median (Maximum) | Lineage |    |     |    | Sensitive | Pre MDR | MDR | Pre XDR | XDR | Other DR |
|--------------|--------------|-----|------------------|---------|----|-----|----|-----------|---------|-----|---------|-----|----------|
|              |              |     |                  | L1      | L2 | L3  | L4 |           |         |     |         |     |          |
| 0            | 28           | 60  | 2 (3)            | 2       | 6  | 35  | 17 | 2         | 2       | 17  | 19      | 20  | 0        |
| 1            | 28           | 60  | 2 (3)            | 2       | 6  | 35  | 17 | 2         | 2       | 17  | 19      | 20  | 0        |
| 5            | 49           | 136 | 2 (17)           | 7       | 16 | 77  | 36 | 2         | 3       | 60  | 29      | 40  | 2        |
| 10           | 55           | 169 | 2 (22)           | 7       | 21 | 98  | 43 | 2         | 3       | 87  | 31      | 44  | 2        |
| 15           | 54           | 176 | 2 (22)           | 8       | 21 | 103 | 44 | 2         | 4       | 90  | 32      | 46  | 2        |
| 20           | 63           | 200 | 2 (22)           | 8       | 24 | 121 | 47 | 2         | 5       | 106 | 35      | 49  | 3        |
| 25           | 68           | 213 | 2 (22)           | 8       | 24 | 131 | 50 | 2         | 5       | 118 | 35      | 50  | 3        |
| 30           | 71           | 220 | 2 (22)           | 8       | 25 | 137 | 50 | 2         | 5       | 124 | 35      | 51  | 3        |

L Lineage, MDR multidrug resistant, XDR extensively drug resistant, DR drug resistance

**S5 Table: Characteristics of 169 *M. tuberculosis* isolates in 55 clusters with a SNP distance of 10 compared to others**

| Characteristic |                  | Trans.<br>(169) | %    | Non-<br>trans.<br>(366) | %    | Odds<br>ratio | 95% CI      | P-value               |
|----------------|------------------|-----------------|------|-------------------------|------|---------------|-------------|-----------------------|
| Lineage        | 1                | 7               | 4.1  | 15                      | 4.1  | 1.00          | -           | -                     |
|                | 2                | 21              | 12.4 | 15                      | 4.1  | 3.00          | 0.98 - 9.15 | 0.054                 |
|                | 3                | 98              | 58.0 | 299                     | 81.7 | 0.70          | 0.28 - 1.77 | 0.454                 |
|                | 4                | 43              | 25.4 | 37                      | 10.1 | 2.49          | 0.92 - 6.76 | 0.073                 |
| DR status      | Sensitive/MDR    | 94              | 55.6 | 328                     | 89.6 | 1.00          | -           | -                     |
|                | Pre-XDR/XDR      | 75              | 44.4 | 38                      | 10.4 | 5.79          | 3.67 - 9.14 | 4.6x10 <sup>-14</sup> |
| Location       | Dera Ismail Khan | 13              | 7.7  | 12                      | 3.3  | 1.00          | -           | -                     |
|                | Peshawar         | 46              | 27.2 | 31                      | 8.5  | 1.37          | 0.55 - 3.39 | 0.497                 |
|                | Other            | 30              | 17.8 | 31                      | 8.5  | 0.89          | 0.35 - 2.27 | 0.812                 |

Trans. transmitted

**S6 Table: Genome-wide association analysis of transmission**

| Gene           | Function                                         | beta  | 95% CI        | P-value               |
|----------------|--------------------------------------------------|-------|---------------|-----------------------|
| <i>nusG</i>    | Transcription termination protein NusG           | 0.791 | 0.545 - 1.036 | 5.8x10 <sup>-10</sup> |
| <i>Rv2307B</i> | Hypothetical glycine rich protein                | 0.745 | 0.491 - 0.999 | 1.5x10 <sup>-8</sup>  |
| <i>wag31</i>   | Cell wall synthesis protein Wag31                | 0.912 | 0.567 - 1.256 | 3.1x10 <sup>-7</sup>  |
| <i>proX</i>    | Possible osmoprotectant binding lipoprotein ProX | 0.706 | 0.423 - 0.988 | 1.3x10 <sup>-6</sup>  |
| <i>murA</i>    | Peptidoglycan biosynthesis pathway               | 0.660 | 0.380 - 0.939 | 4.7x10 <sup>-6</sup>  |

**S7 Table: Number of samples with known drug resistance-associated mutations**

S7\_table\_known\_mutations.xls

**S8 Table: Phenotypically resistance samples (n=82) with variants previously unknown to be associated with drug resistance.**

S8\_table\_novel\_mutations.xlsx

**S1 Figure: Phylogenetic tree for the 535 *M. tuberculosis* isolates with individual genomic drug resistance predictions.**

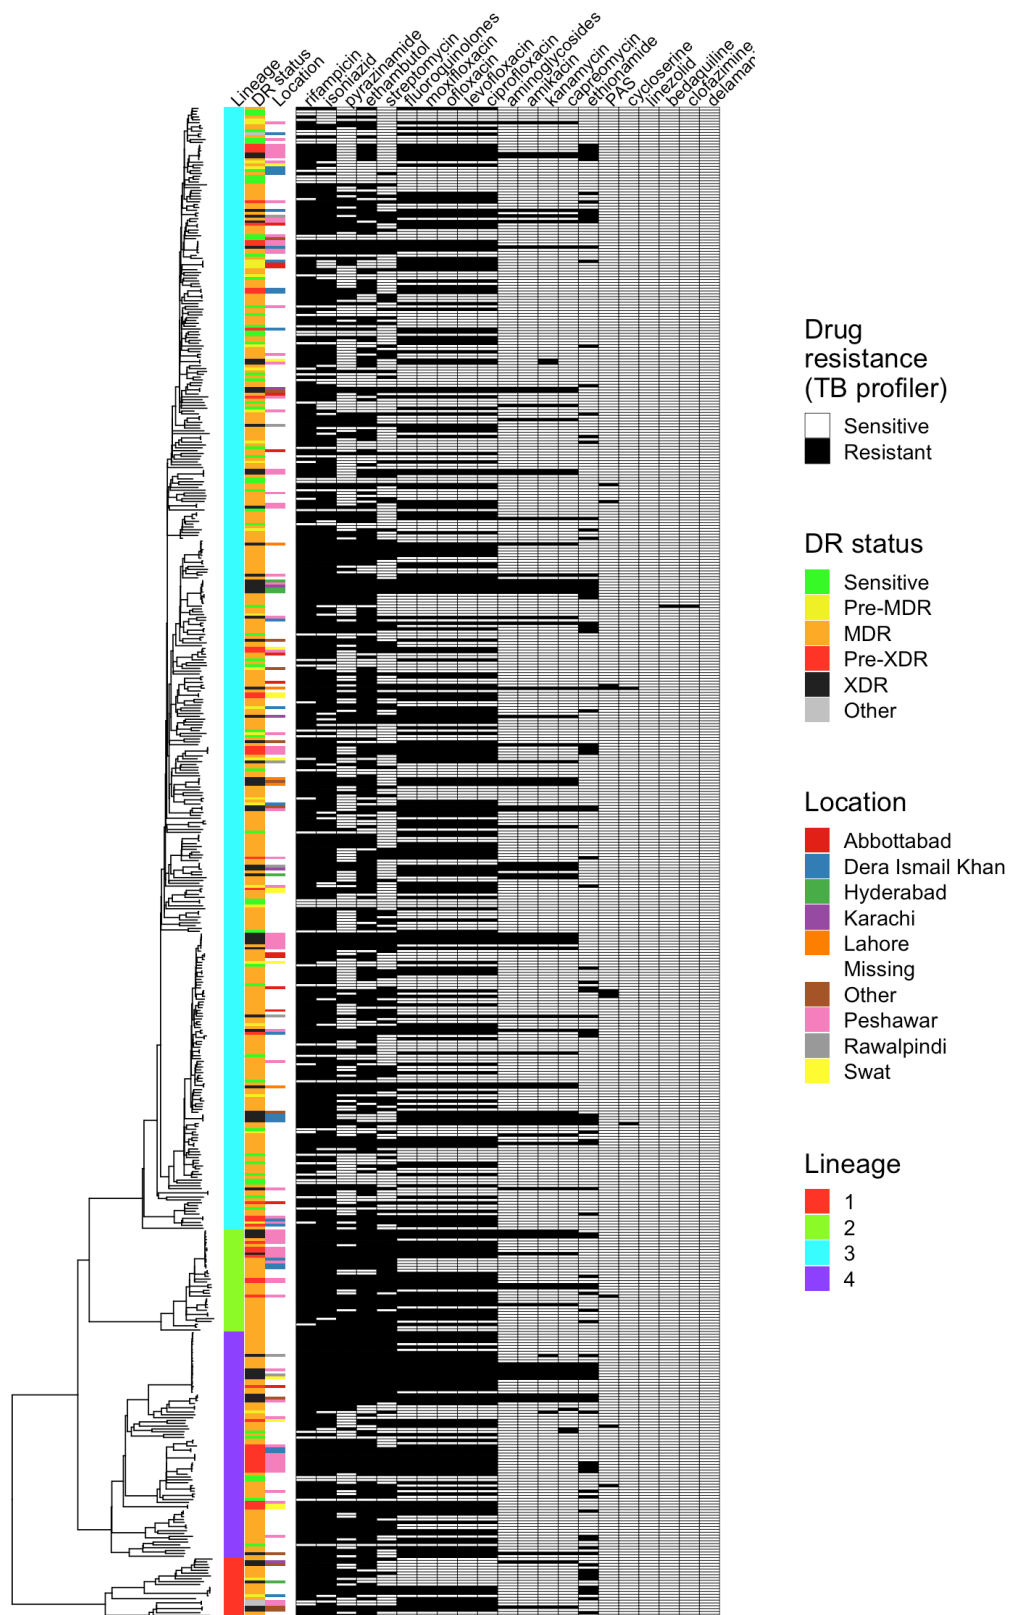

**S2 Figure: SNP distance analyses and clusters (n=535). (top) Density of pairwise SNP differences for all samples; (bottom) number of clustering samples at minimum pairwise SNP difference thresholds**

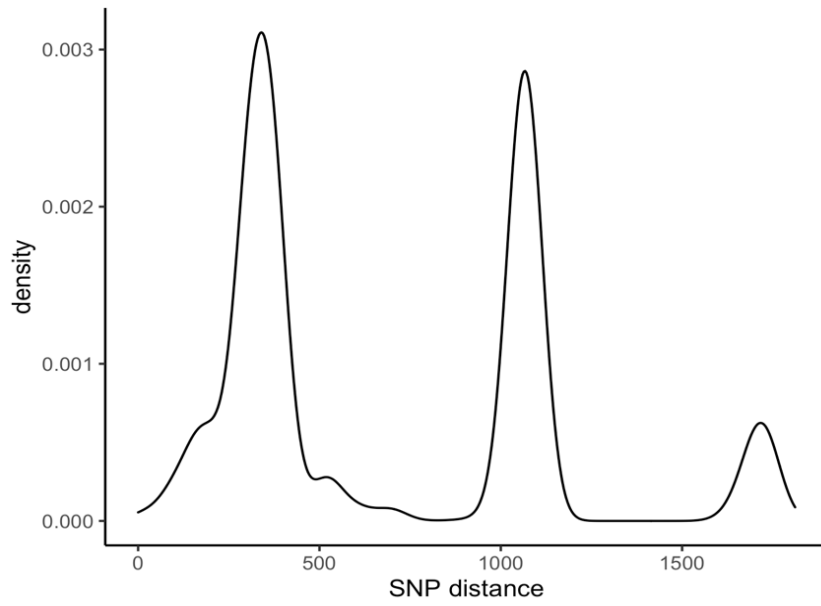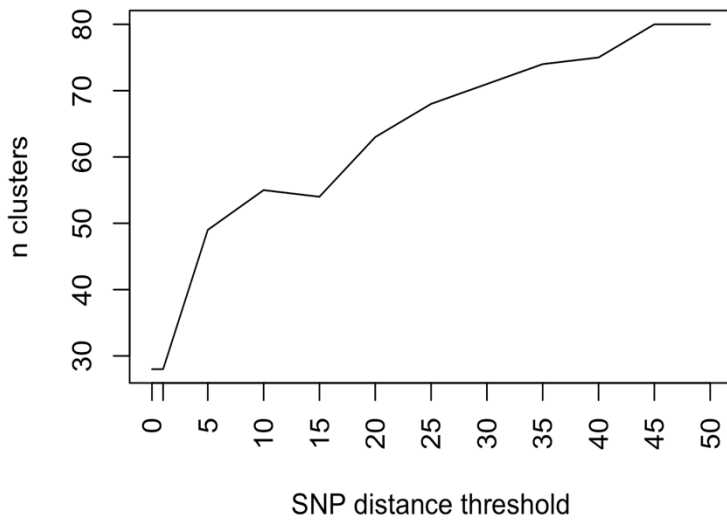



S3 Figure: Locations of samples in the transmission chains (n = 169)

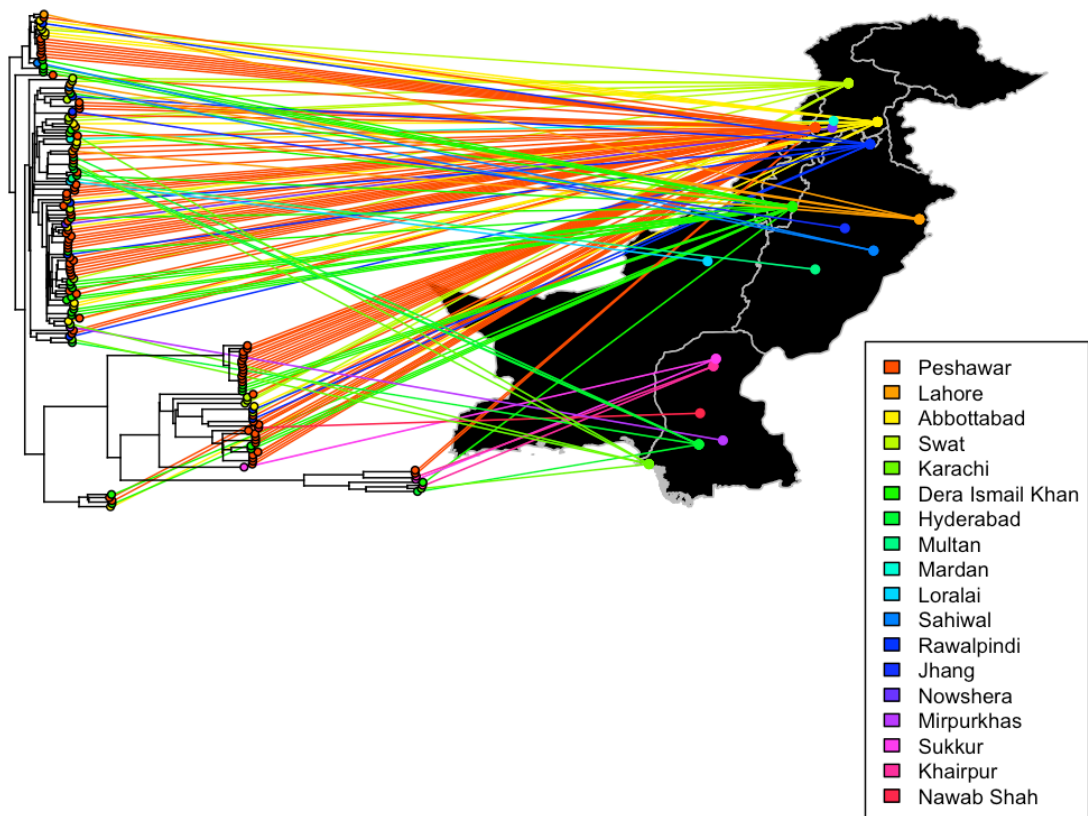

**S4 Figure: The clusters with isolates at  $\leq 10$  SNP distance ( $n = 169$ ), by lineage (top), drug resistance status (middle), and location (bottom).**

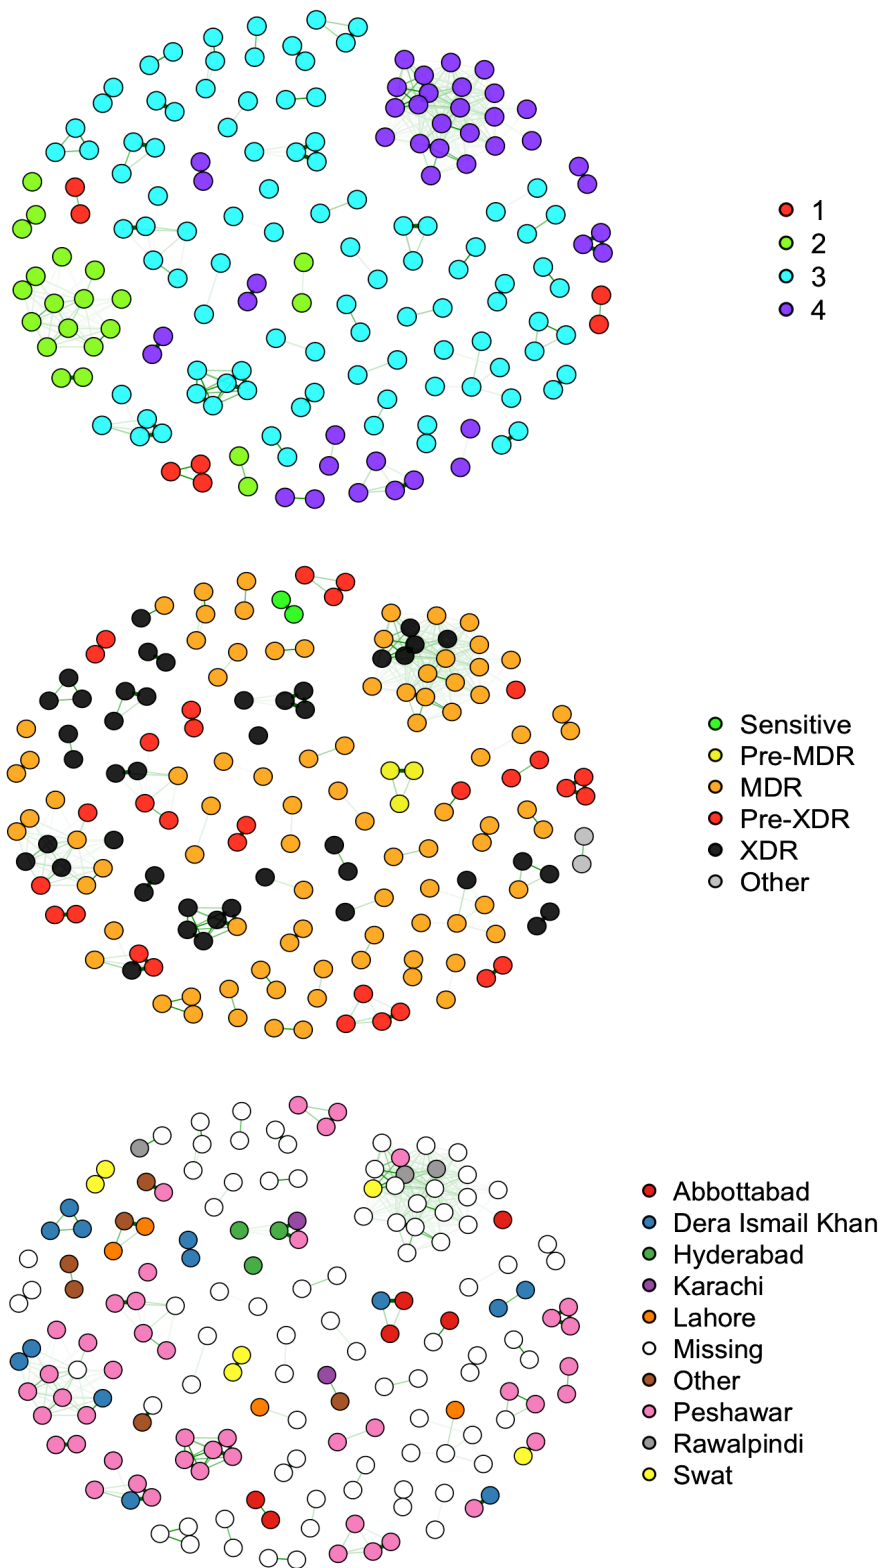

S5 Figure

Phylogenetic location of mutations in genes compared with location of transmission samples.

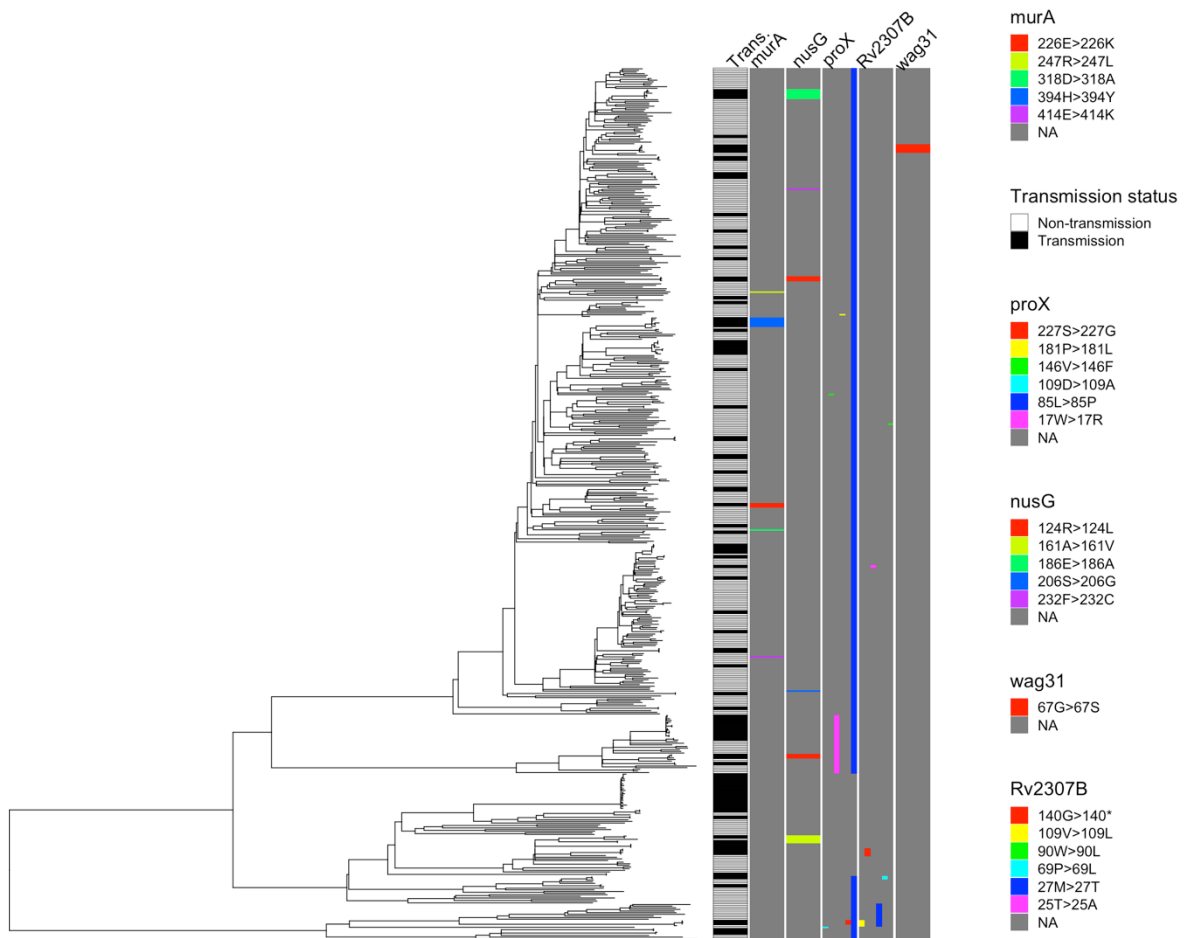

Supplement: 41598_2022_11795_MOESM3_ESM.pdf [file 41598_2022_11795_MOESM3_ESM.pdf]
